# Supplementary material
Source: PubMed Central journal article supplement (PMC5606316)
Supplement: DB170413SupplementaryData.pdf [file DB170413SupplementaryData.pdf]

SUPPLEMENTARY DATA

**Supplementary Table 1.** FE<sub>L</sub>, CL<sub>P</sub>, V<sub>d</sub>, K<sub>m</sub> and V<sub>max</sub> values, shown as mean (SD). K<sub>m</sub> and V<sub>max</sub> are just obtained for the subjects analyzed with the saturable model.

|                             | <b>EA</b>     | <b>AA</b>      |
|-----------------------------|---------------|----------------|
| <i>N</i>                    | 29            | 18             |
| FE <sub>L</sub> (%)         | 44.2 (20.8)   | 17.3 (14.8)    |
| CL <sub>P</sub> (mL/kg/min) | 12.1 (8.7)    | 15.9 (10.0)    |
| V <sub>d</sub> (L)          | 7.6 (2.8)     | 6.7 (2.4)      |
| <i>N</i>                    | 4             | 6              |
| K <sub>m</sub> (pmol/min)   | 551.1 (554.7) | 1076.9 (849.0) |
| V <sub>max</sub> (pmol/min) | 414.6 (457.9) | 305.0 (376.1)  |
